# Supplementary material for: CD28.OX40 co-stimulatory combination is associated with long in vivo persistence and high activity of CAR.CD30 T cells
Source: PubMed Central journal article supplement — Haematologica. 2020 May 7;106(4):987–99. doi: 10.3324/haematol.2019.231183 (PMC8018158; doi:10.3324/haematol.2019.231183), 2020-05-07
Supplement: 2019_231183-Disclosures_Contributions.pdf [file 2019_231183-Disclosures_Contributions.pdf]

Haematologica  
HAEMATOL/2019/231183  
Version 4

CD28.OX40 co-stimulatory combination is associated with long in vivo persistence and high activity of CAR.CD30 T-cells

Marika Guercio, Domenico Orlando, Stefano Di Cecca, Matilde Sinibaldi, Iolanda Boffa, Simona Caruso, Zeinab Abbaszadeh, Antonio Camera, Biancamaria Cembrola, Katia Bovetti, Simona Manni, Ignazio Caruana, Roselia Ciccone, Francesca Del Bufalo, Pietro Merli, Luciana Vinti, Katia Girardi, Annalisa Ruggeri, Cristiano De Stefanis, Marco Pezzullo, Ezio Giorda, Marco Scarsella, Rita De Vito, Sabina Barresi, Andrea Ciolfi, Marco Tartaglia, Lorenzo Moretta, Franco Locatelli, Concetta Quintarelli, and Biagio De Angelis

Disclosures: 1)The chemical inducer of dimerization CID (AP1903) was kindly provided by Bellicum Pharmaceuticals (USA) 2)The authors have no conflicting financial interests 3) patent application No. 102018000003464

Contributions: B.D.A., C.Q. and F. L. share Last authorship. F.L. is the Senior author of the paper. M.G. is the First author of the paper. M.G., C.Q, B.D.A. and F.L. designed experimental studies, supervised the project conduction, analyzed the data and wrote the manuscript. M.G., D.O., S.D.C., M.S., S.C., I.B., Z.A., A.C., B.C., K.B.,S.M.,R.C., I.C., C.D.S., M.P., E.G., M.S., S.M., R.C. and R.D.V. performed the in vitro experiments. C.D.S., M.P. performed immunoistochemistry assay M.G., I.B., B.D.A. and C.Q. performed the in vivo experiments. D.O. and M.G and B.D.A. cloned the retroviral vector. M.G., E.G., M.S. and M.S. performed FACS analysis. A.R., F.D.B., P.M., L.V., K.G., R.D.V., L.M. and F.L. provided patient's samples, medical advices and expertise in pediatric lymphoma. S.B., A.Ci., M.T. performed data analyses
